# Supplementary material for: Base-promoted aryl–bromine bond cleavage with cobalt(ii) porphyrins via a halogen atom transfer mechanism
Source: Royal Society of Chemistry journal article supplement (doi:10.1039/c4dt00155a), 2014-01-01

# Base-Promoted Aryl-Bromine Bond Cleavage with Cobalt(II) Porphyrins via Halogen Atom Transfer Mechanism

*Chun Ran Liu, Ying Ying Qian, and Kin Shing Chan\**

Department of Chemistry, The Chinese University of Hong Kong, Shatin, New Territories, Hong  
Kong, People's Republic of China

Email: [ksc@cuhk.edu.hk](mailto:ksc@cuhk.edu.hk)

## **List of Contents Pages**

|                                                                          |    |
|--------------------------------------------------------------------------|----|
| 1. X-ray Craystallographic Data and Structure of Co(tp)(4-methoxyphenyl) | S2 |
| 2. NMR Spectra                                                           | S4 |

## 1. X-ray Craystallographic Data and Structure of Co(tpp)(4-methoxyphenyl) (**3e**)

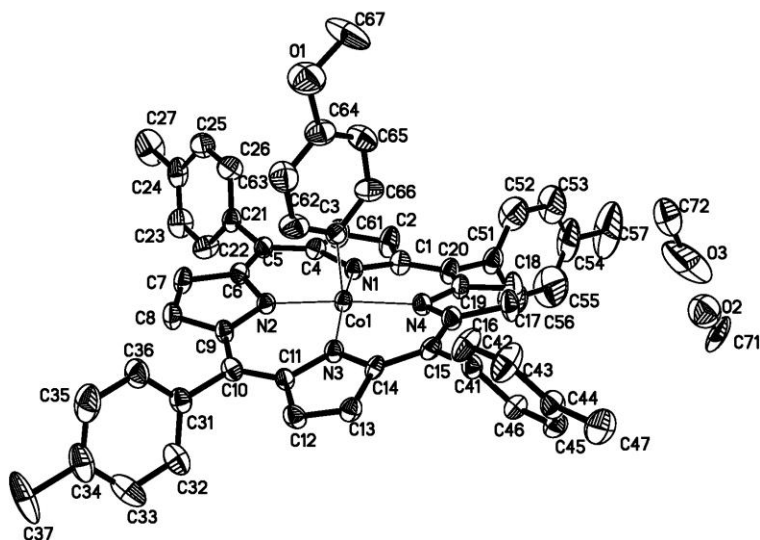

**Figure S1.** ORTEP presentation of Co(tpp)(4-methoxyphenyl) (**3e**) (30% probability displacement ellipsoids). Hydrogen atoms are omitted for clarity.

**Table S1. Crystal Data and Structure Refinement for Co(ttp)(4-methoxyphenyl) (3e).**

|                                   |                                                                                                                         |
|-----------------------------------|-------------------------------------------------------------------------------------------------------------------------|
| Compound                          | Co(ttp)(4-methoxyphenyl) (3e)                                                                                           |
| Empirical formula                 | C <sub>55.50</sub> H <sub>45</sub> Co N <sub>4</sub> O <sub>1.50</sub>                                                  |
| Formula weight                    | 850.88                                                                                                                  |
| Temperature                       | 296(2) K                                                                                                                |
| Wavelength                        | 0.71073 Å                                                                                                               |
| Crystal system, space group       | Monoclinic, P2(1)/c                                                                                                     |
| Unit cell dimensions              | a = 21.671(3) Å    alpha = 90 deg.<br>b = 14.9796(19) Å    beta = 105.867(3) deg.<br>c = 16.421(2) Å    gamma = 90 deg. |
| Volume                            | 5127.6(12) Å <sup>3</sup>                                                                                               |
| Z, Calculated density             | 4, 1.102 Mg/m <sup>3</sup>                                                                                              |
| Absorption coefficient            | 0.375 mm <sup>-1</sup>                                                                                                  |
| F(000)                            | 1780                                                                                                                    |
| Crystal size                      | 0.40 x 0.30 x 0.20 mm                                                                                                   |
| Theta range for data collection   | 0.98 to 27.86 deg.                                                                                                      |
| Limiting indices                  | -28<=h<=28, -19<=k<=19, -21<=l<=21                                                                                      |
| Reflections collected / unique    | 44668 / 12177 [R(int) = 0.2426]                                                                                         |
| Completeness to theta = 25.25     | 99.6 %                                                                                                                  |
| Absorption correction             | multi-scan                                                                                                              |
| Max. and min. transmission        | 0.7076 and 0.5710                                                                                                       |
| Refinement method                 | Full-matrix least-squares on F <sup>2</sup>                                                                             |
| Data / restraints / parameters    | 12177 / 8 / 586                                                                                                         |
| Goodness-of-fit on F <sup>2</sup> | 0.991                                                                                                                   |
| Final R indices [I>2sigma(I)]     | R1 = 0.1181, wR2 = 0.2926                                                                                               |
| R indices (all data)              | R1 = 0.3032, wR2 = 0.3901                                                                                               |
| Largest diff. peak and hole       | 0.963 and -0.586 e.Å <sup>-3</sup>                                                                                      |

## 2. NMR Spectra

| No | Spectra                                                                                                                          | Page |
|----|----------------------------------------------------------------------------------------------------------------------------------|------|
| 1  | <sup>1</sup> H NMR Spectrum of Co <sup>III</sup> (ttp)Ph ( <b>3a</b> )                                                           | 5    |
| 2  | <sup>13</sup> C NMR Spectrum of Co <sup>III</sup> (ttp)Ph ( <b>3a</b> )                                                          | 5    |
| 3  | <sup>1</sup> H NMR Spectrum of Co <sup>III</sup> (tap)Ph ( <b>3b</b> )                                                           | 6    |
| 4  | <sup>1</sup> H NMR Spectrum of Co <sup>III</sup> (tpp)Ph ( <b>3c</b> )                                                           | 6    |
| 5  | <sup>1</sup> H NMR Spectrum of Co <sup>III</sup> (t <sub>4</sub> -cip)Ph ( <b>3d</b> )                                           | 7    |
| 6  | <sup>13</sup> C NMR Spectrum of Co <sup>III</sup> (t <sub>4</sub> -cip)Ph ( <b>3d</b> )                                          | 7    |
| 7  | <sup>1</sup> H NMR Spectrum of Co <sup>III</sup> (ttp)C <sub>6</sub> H <sub>4</sub> ( <i>p</i> -OMe) ( <b>3e</b> )               | 8    |
| 8  | <sup>13</sup> C NMR Spectrum of Co <sup>III</sup> (ttp)C <sub>6</sub> H <sub>4</sub> ( <i>p</i> -OMe) ( <b>3e</b> )              | 8    |
| 9  | <sup>1</sup> H NMR Spectrum of Co <sup>III</sup> (ttp)C <sub>6</sub> H <sub>4</sub> ( <i>p</i> -Me) ( <b>3f</b> )                | 9    |
| 10 | <sup>13</sup> C NMR Spectrum of Co <sup>III</sup> (ttp)C <sub>6</sub> H <sub>4</sub> ( <i>p</i> -Me) ( <b>3f</b> )               | 9    |
| 11 | <sup>1</sup> H NMR Spectrum of Co <sup>III</sup> (ttp)C <sub>6</sub> H <sub>4</sub> ( <i>p</i> -tert-butyl) ( <b>3g</b> )        | 10   |
| 12 | <sup>13</sup> C NMR Spectrum of Co <sup>III</sup> (ttp)C <sub>6</sub> H <sub>4</sub> ( <i>p</i> -tert-butyl) ( <b>3g</b> )       | 10   |
| 13 | <sup>1</sup> H NMR Spectrum of Co <sup>III</sup> (ttp)C <sub>6</sub> H <sub>4</sub> ( <i>p</i> -Cl) ( <b>3h</b> )                | 11   |
| 14 | <sup>13</sup> C NMR Spectrum of Co <sup>III</sup> (ttp)C <sub>6</sub> H <sub>4</sub> ( <i>p</i> -Cl) ( <b>3h</b> )               | 11   |
| 15 | <sup>1</sup> H NMR Spectrum of Co <sup>III</sup> (ttp)C <sub>6</sub> H <sub>4</sub> ( <i>p</i> -F) ( <b>3i</b> )                 | 12   |
| 16 | <sup>13</sup> C NMR Spectrum of Co <sup>III</sup> (ttp)C <sub>6</sub> H <sub>4</sub> ( <i>p</i> -F) ( <b>3i</b> )                | 12   |
| 17 | <sup>1</sup> H NMR Spectrum of Co <sup>III</sup> (ttp)C <sub>6</sub> H <sub>4</sub> ( <i>p</i> -NO <sub>2</sub> ) ( <b>3j</b> )  | 13   |
| 18 | <sup>13</sup> C NMR Spectrum of Co <sup>III</sup> (ttp)C <sub>6</sub> H <sub>4</sub> ( <i>p</i> -NO <sub>2</sub> ) ( <b>3j</b> ) | 13   |
| 19 | <sup>1</sup> H NMR Spectrum of Co <sup>III</sup> (ttp)C <sub>6</sub> H <sub>4</sub> ( <i>p</i> -C(O)Me) ( <b>3k</b> )            | 14   |
| 20 | <sup>13</sup> C NMR Spectrum of Co <sup>III</sup> (ttp)C <sub>6</sub> H <sub>4</sub> ( <i>p</i> -C(O)Me) ( <b>3k</b> )           | 14   |

<sup>1</sup>H NMR Spectrum of Co<sup>III</sup>(ttp)Ph (**3a**) (CDCl<sub>3</sub>)

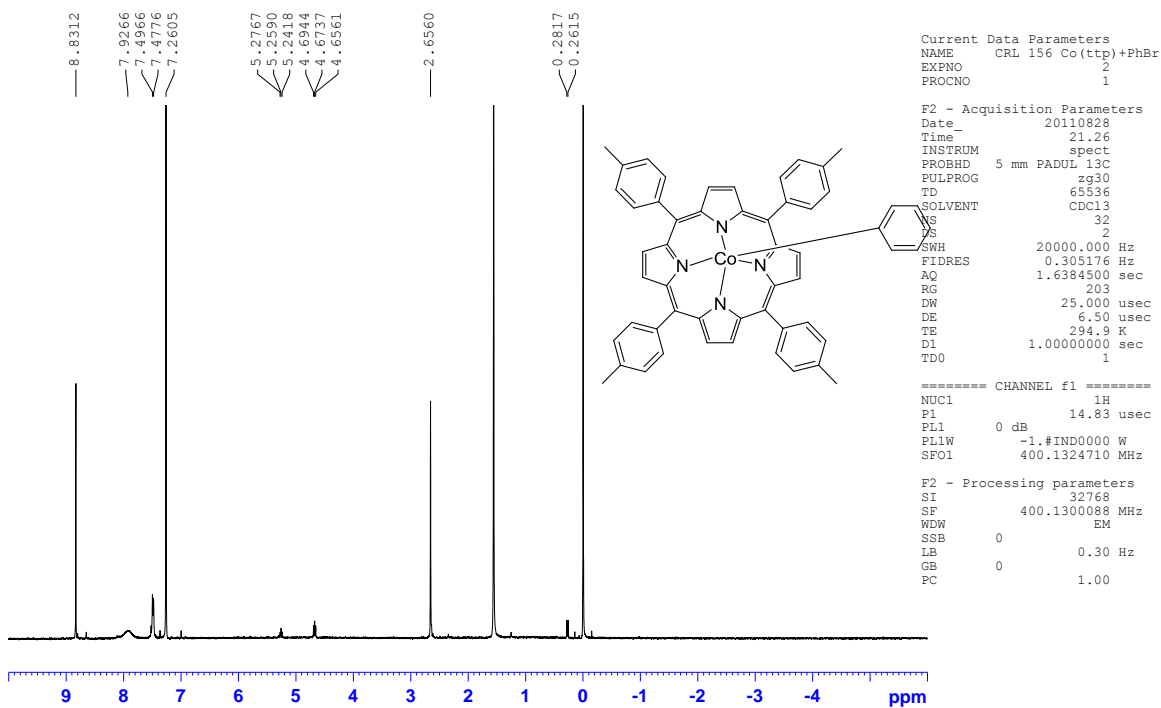

<sup>13</sup>C NMR Spectrum of Co<sup>III</sup>(ttp)Ph (**3a**) (CDCl<sub>3</sub>)

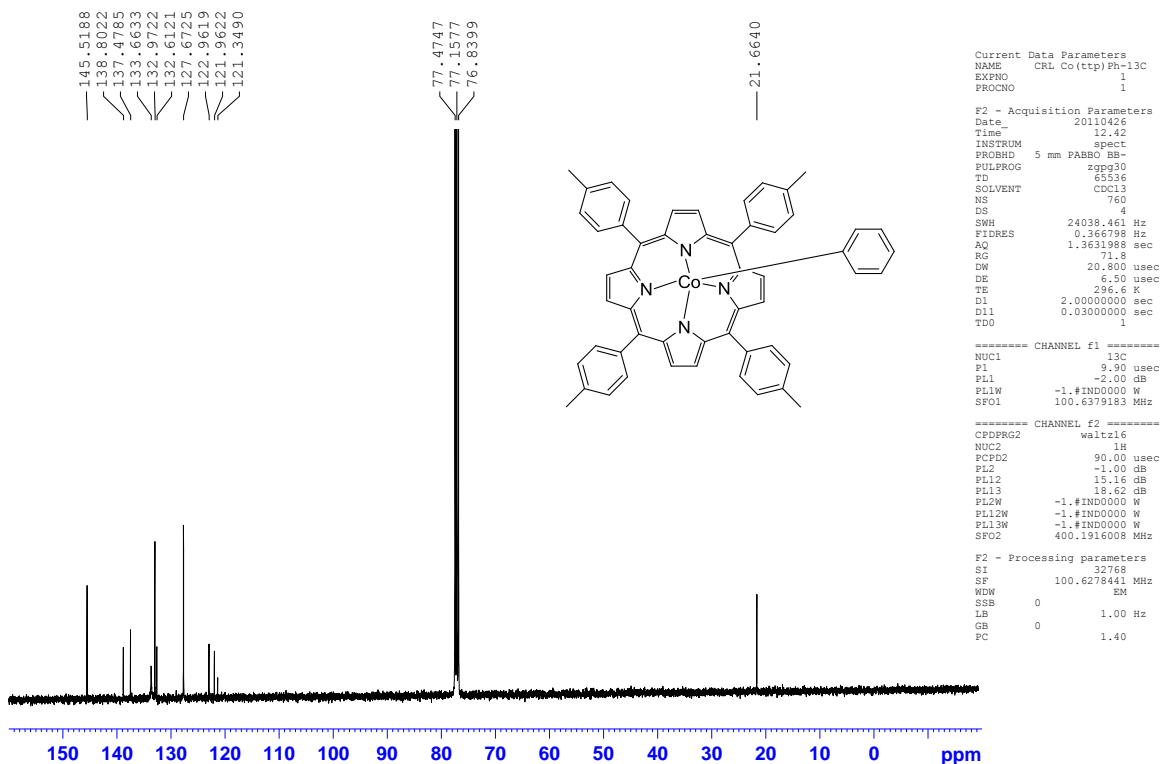

<sup>1</sup>H NMR Spectrum of Co<sup>III</sup>(tap)Ph (**3b**) (CDCl<sub>3</sub>)

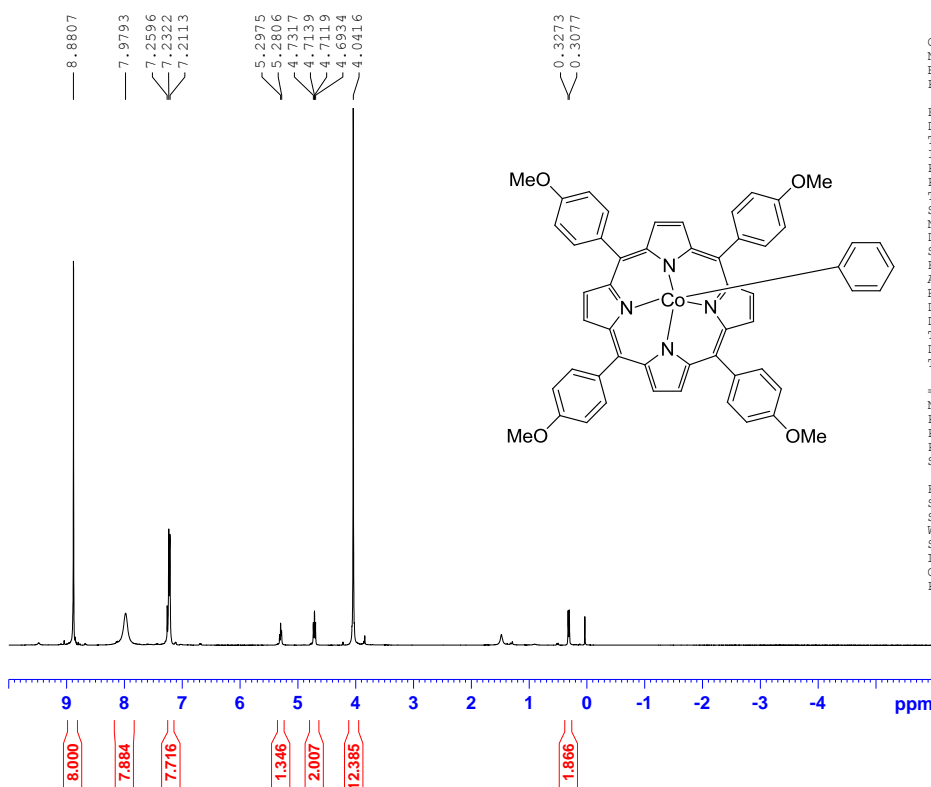

<sup>1</sup>H NMR Spectrum of Co<sup>III</sup>(tpp)Ph (**3c**) (CDCl<sub>3</sub>)

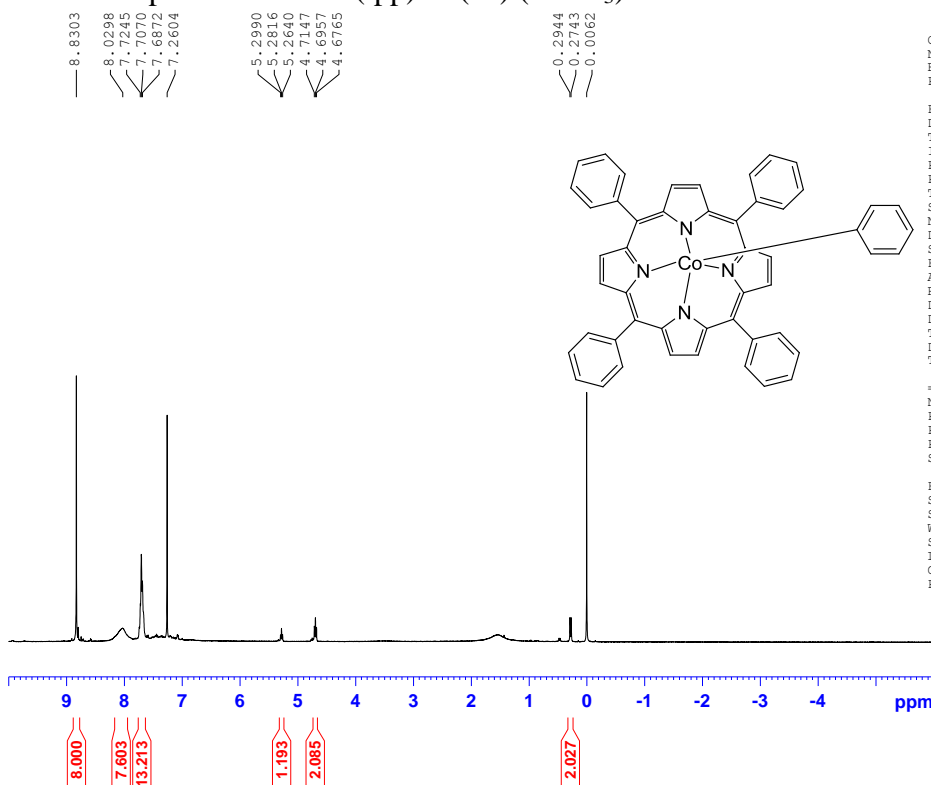

# $^1\text{H}$ NMR Spectrum of $\text{Co}^{\text{III}}(\text{t}_4\text{-Clpp})\text{Ph}$ (**3d**) ( $\text{CDCl}_3$ )

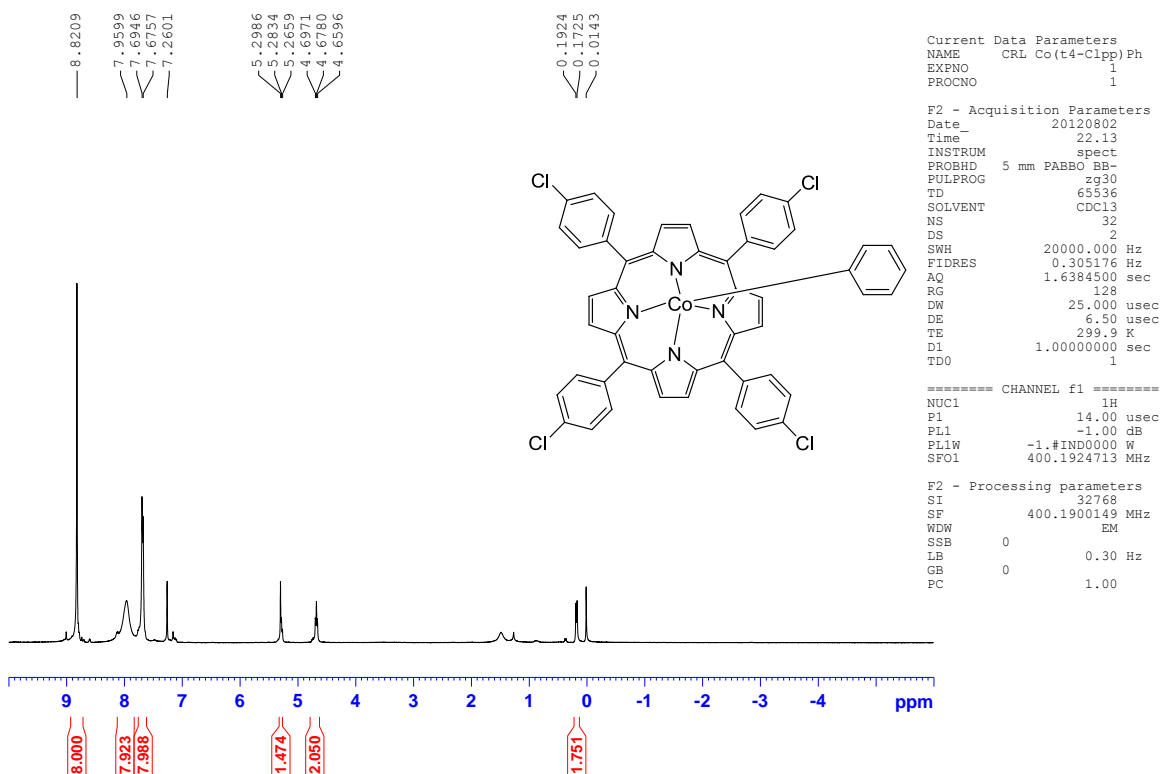

# $^{13}\text{C}$ NMR Spectrum of $\text{Co}^{\text{III}}(\text{t}_4\text{-Clpp})\text{Ph}$ (**3d**) ( $\text{CDCl}_3$ )

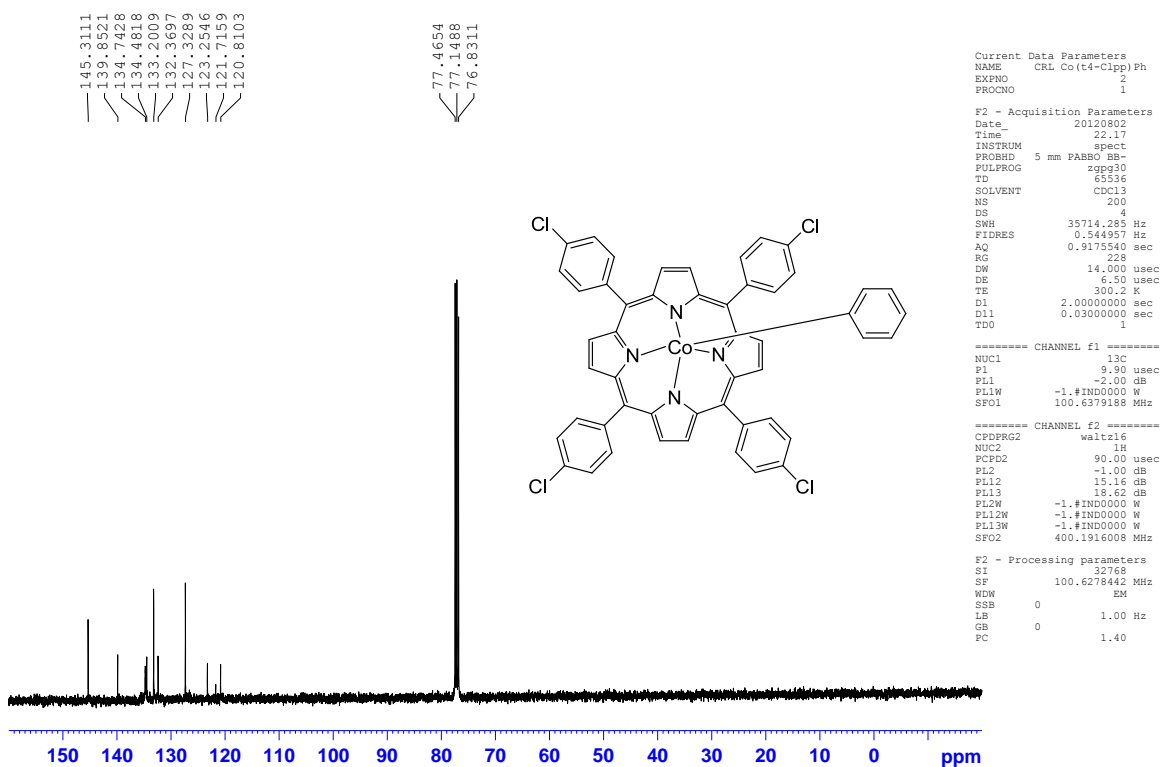

<sup>1</sup>H NMR Spectrum of Co<sup>III</sup>(ttp)C<sub>6</sub>H<sub>4</sub>(*p*-OMe) (**3e**) (CDCl<sub>3</sub>)

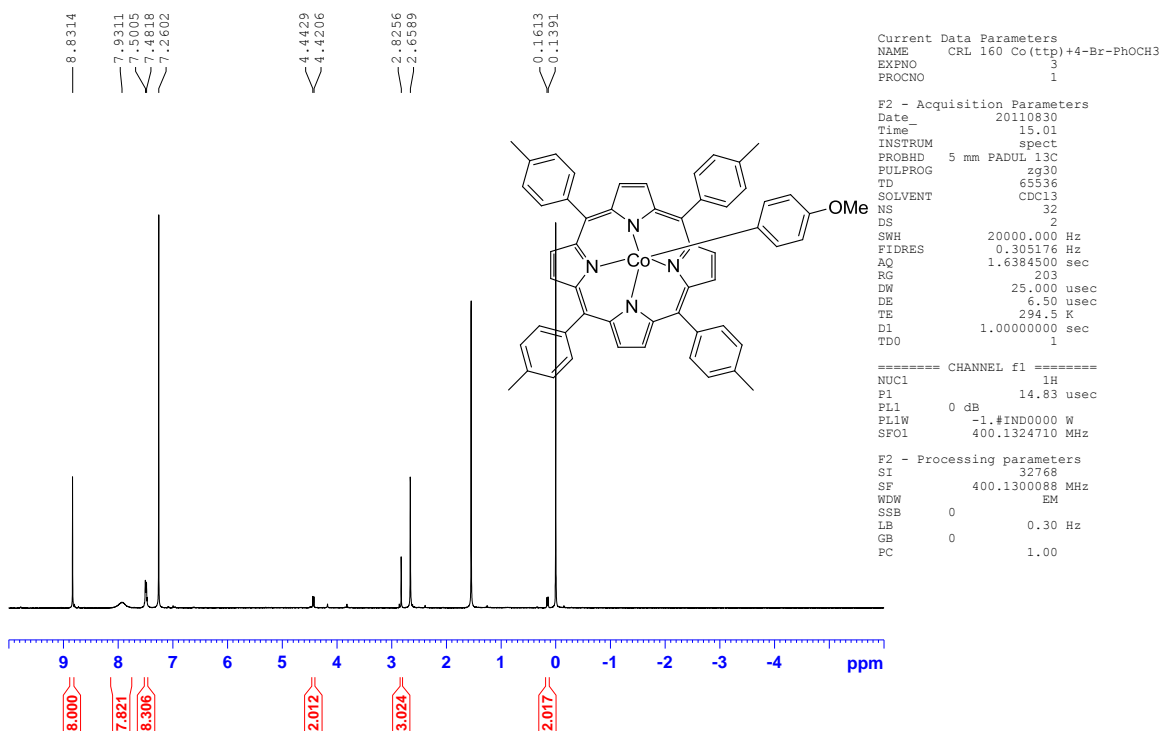

<sup>13</sup>C NMR Spectrum of Co<sup>III</sup>(ttp)C<sub>6</sub>H<sub>4</sub>(*p*-OMe) (**3e**) (CDCl<sub>3</sub>)

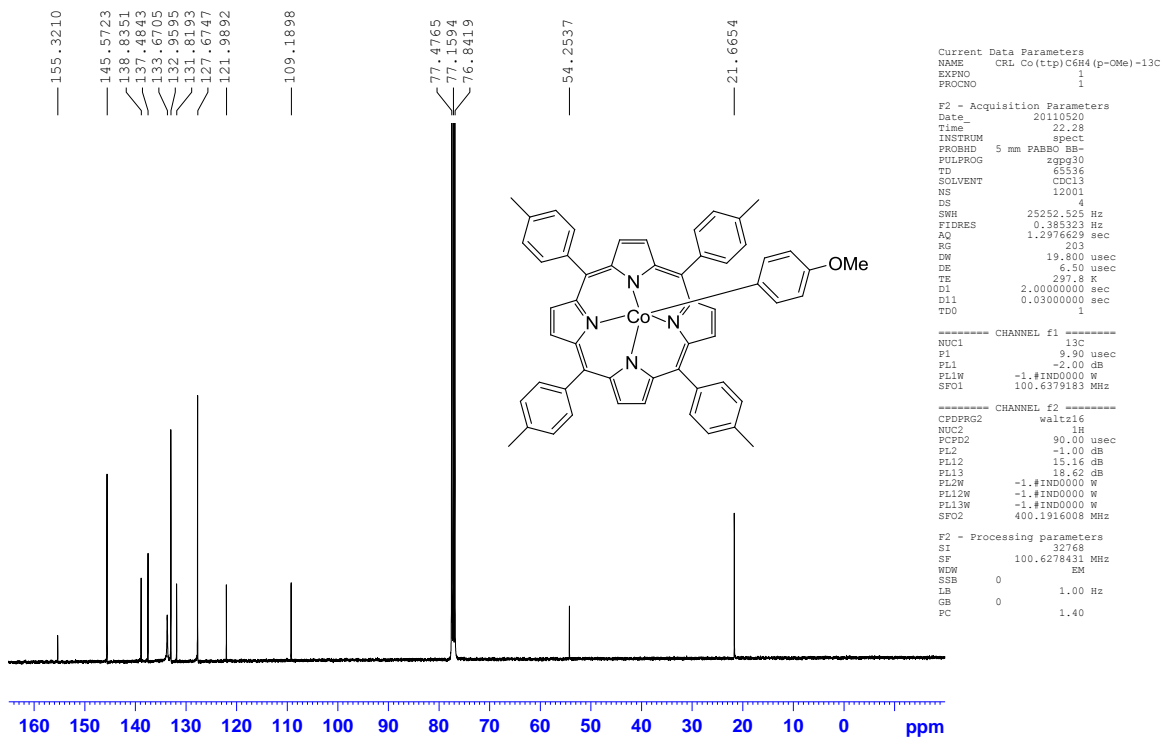



<sup>1</sup>H NMR Spectrum of Co<sup>III</sup>(ttp)C<sub>6</sub>H<sub>4</sub>(*p*-Me) (**3f**) (CDCl<sub>3</sub>)

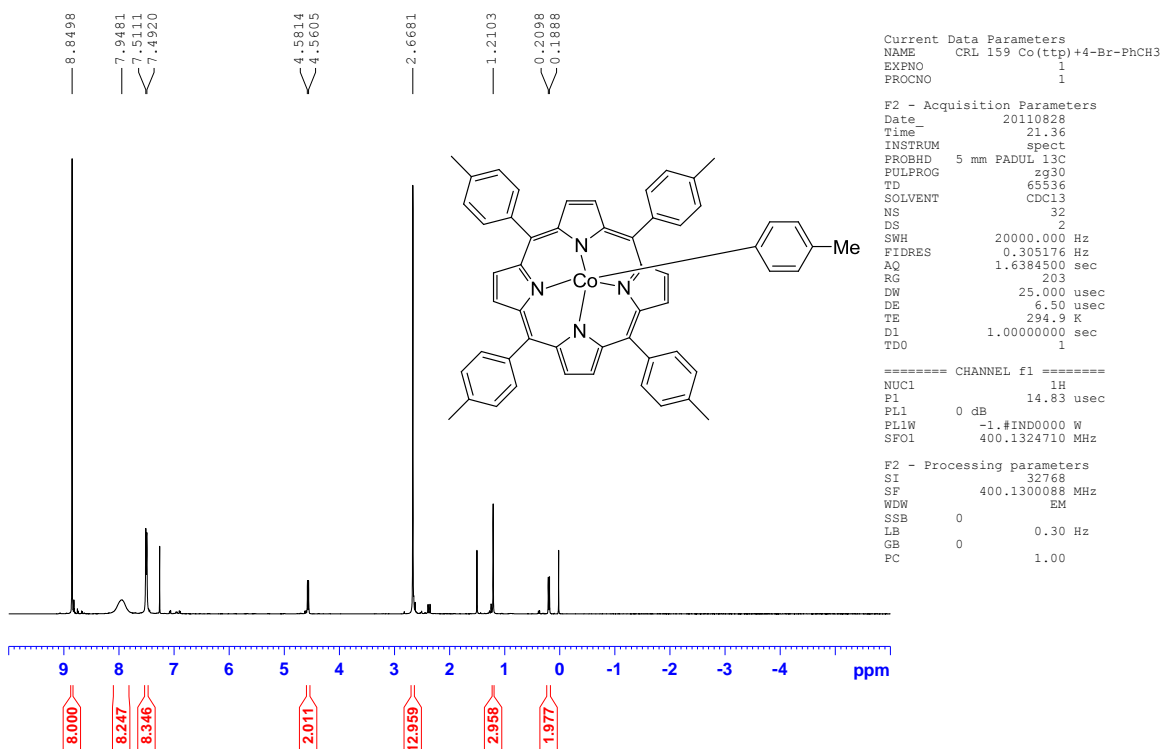

<sup>13</sup>C NMR Spectrum of Co<sup>III</sup>(tpp)C<sub>6</sub>H<sub>4</sub>(*p*-Me) (**3f**) (CDCl<sub>3</sub>)

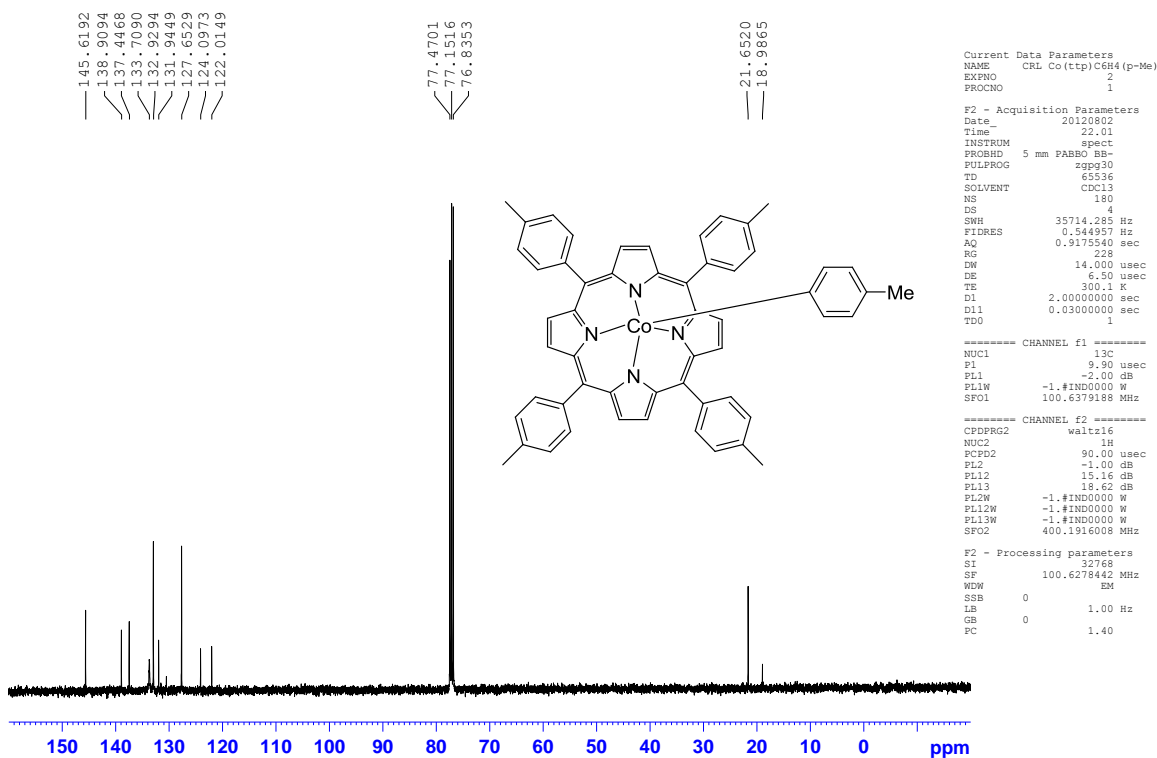

<sup>1</sup>H NMR Spectrum of Co<sup>III</sup>(ttp)C<sub>6</sub>H<sub>4</sub>(*p*-tert-butyl) (**3g**) (CDCl<sub>3</sub>)

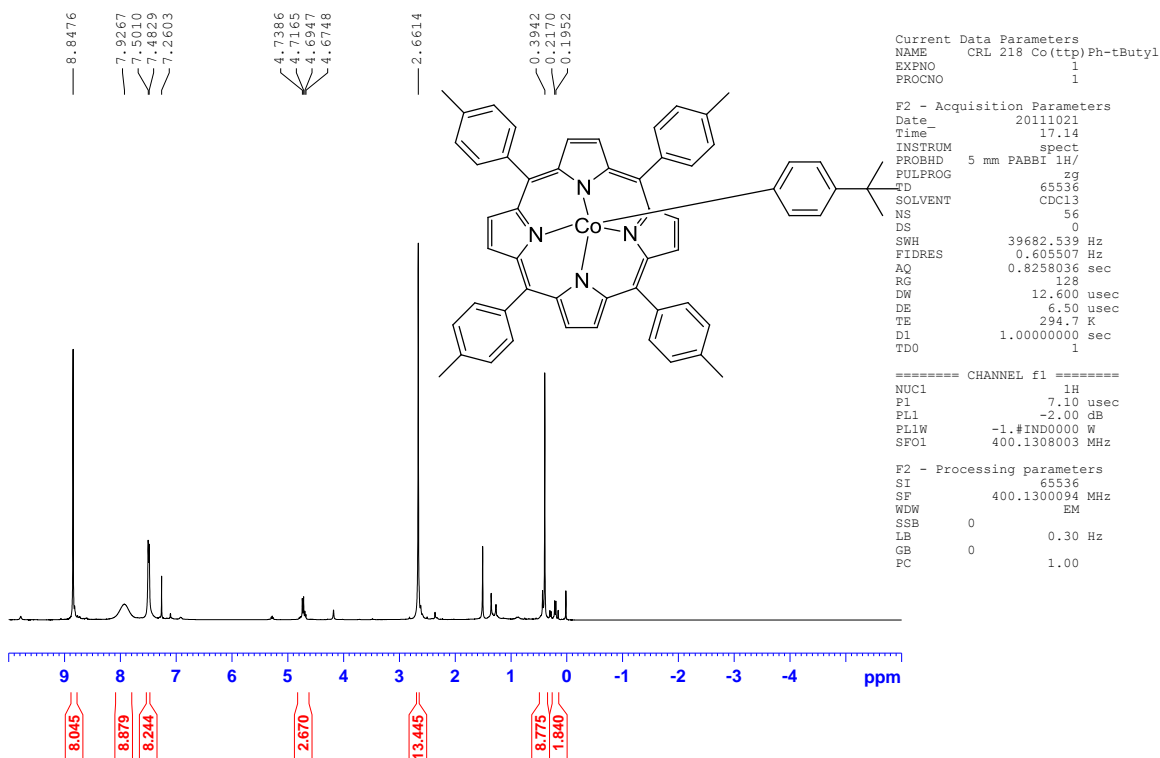

<sup>13</sup>C NMR Spectrum of Co<sup>III</sup>(tp)C<sub>6</sub>H<sub>4</sub>(*p*-tert-butyl) (**3g**) (CDCl<sub>3</sub>)

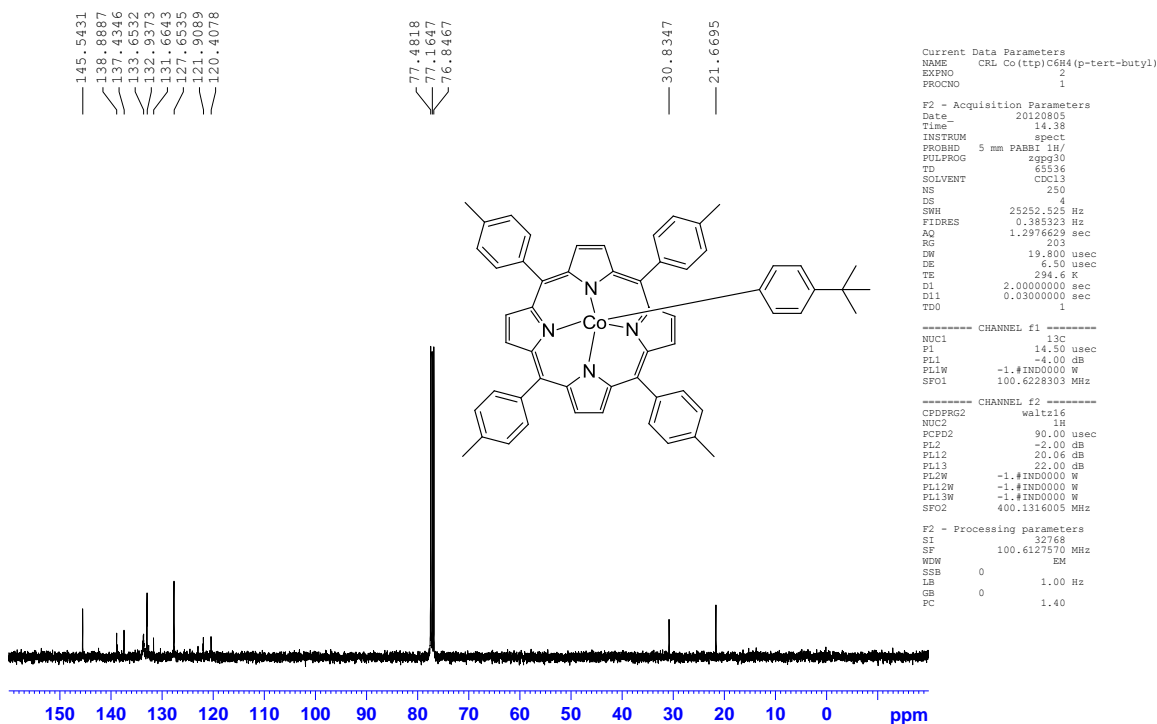

<sup>1</sup>H NMR Spectrum of Co<sup>III</sup>(ttp)C<sub>6</sub>H<sub>4</sub>(*p*-Cl) (**3h**) (CDCl<sub>3</sub>)

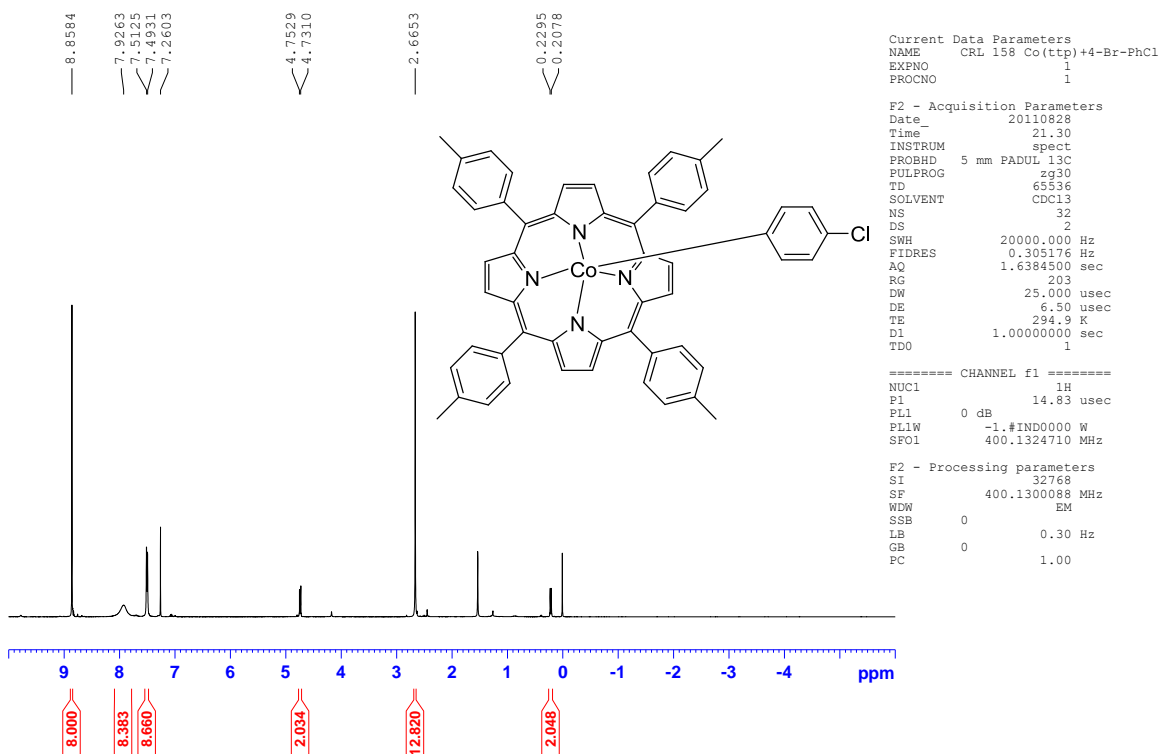

<sup>13</sup>C NMR Spectrum of Co<sup>III</sup>(tpp)C<sub>6</sub>H<sub>4</sub>(*p*-Cl) (**3h**) (CDCl<sub>3</sub>)

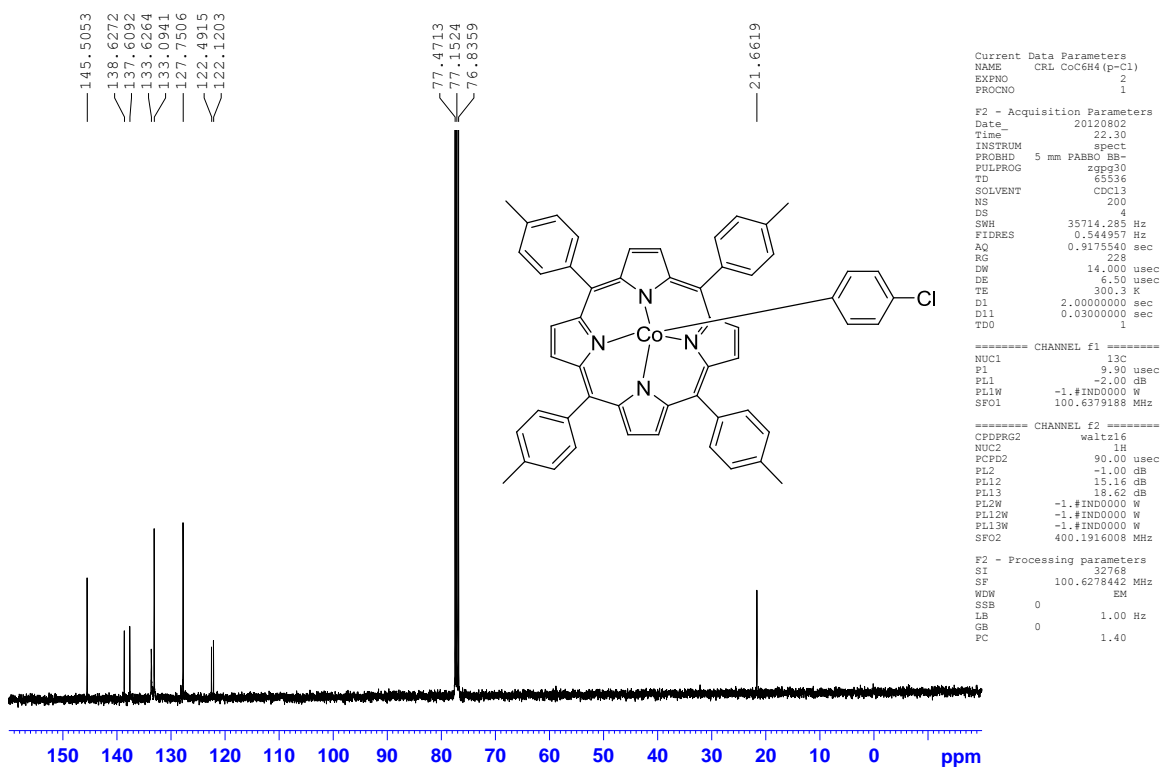

$^1\text{H}$  NMR Spectrum of  $\text{Co}^{\text{III}}(\text{ttp})\text{C}_6\text{H}_4(p\text{-F})$  (**3i**) ( $\text{CDCl}_3$ )

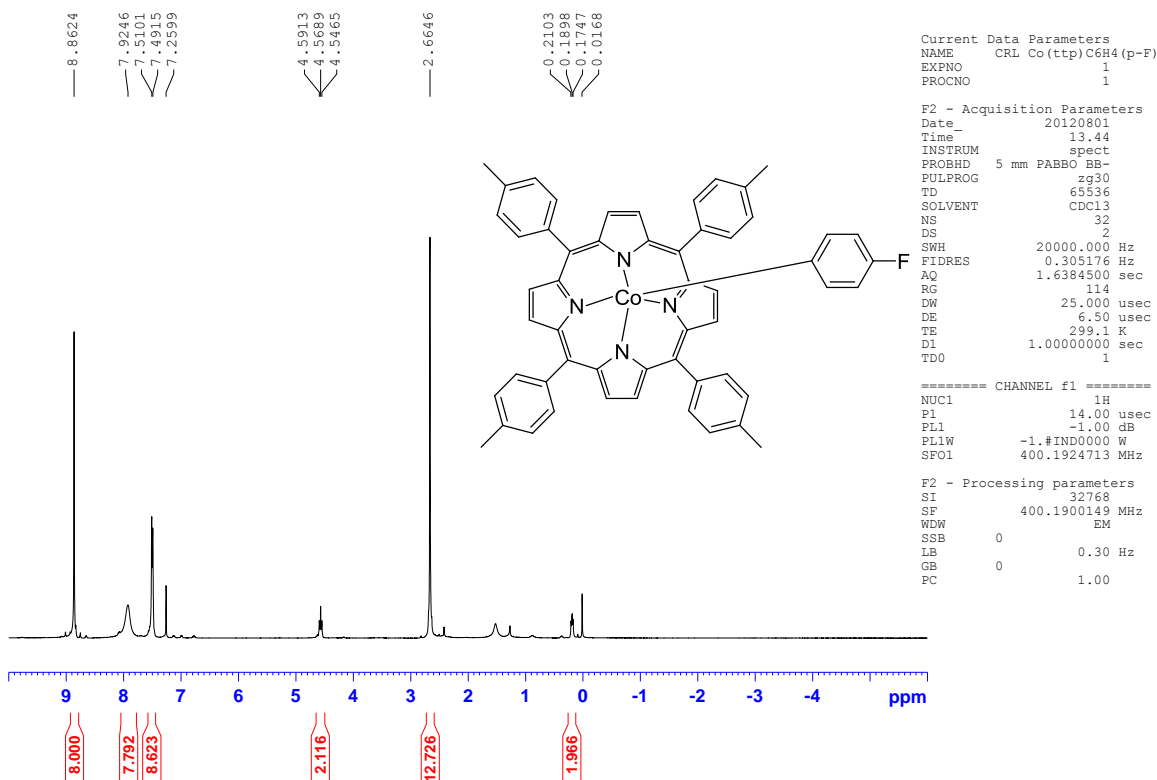

$^{13}\text{C}$  NMR Spectrum of  $\text{Co}^{\text{III}}(\text{ttp})\text{C}_6\text{H}_4(p\text{-F})$  (**3i**) ( $\text{CDCl}_3$ )

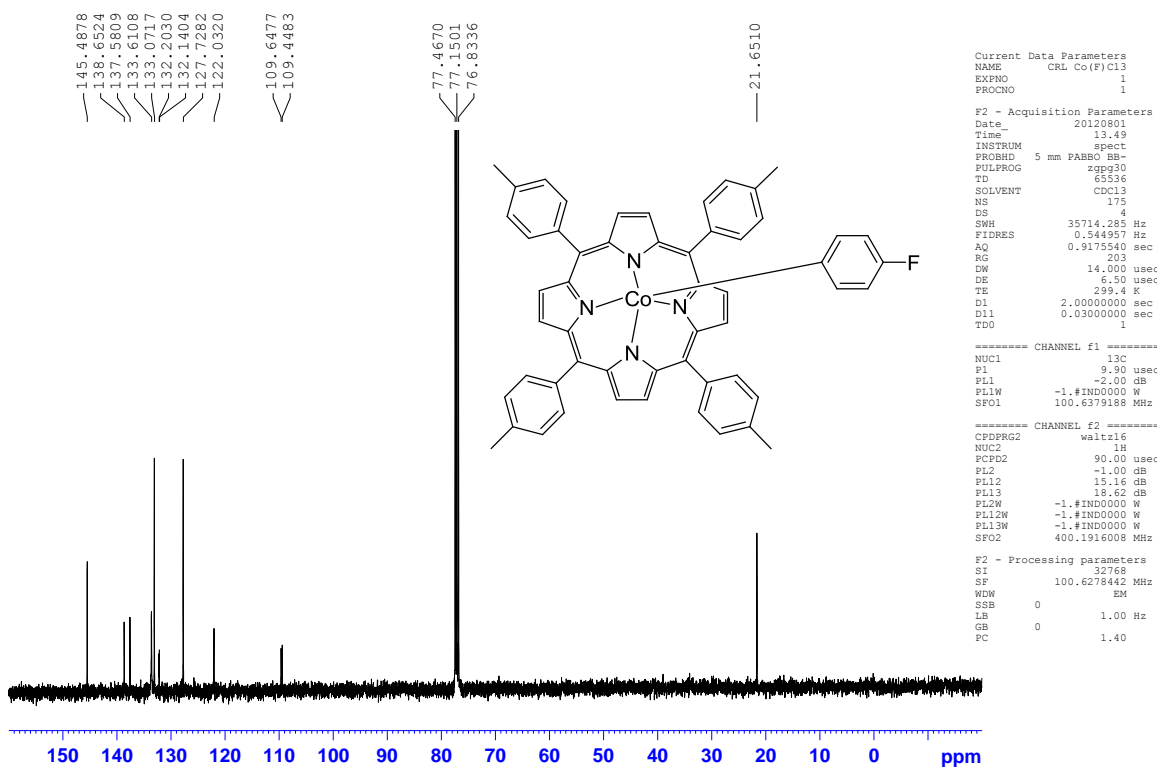

<sup>1</sup>H NMR Spectrum of Co<sup>III</sup>(ttp)C<sub>6</sub>H<sub>4</sub>(*p*-NO<sub>2</sub>) (**3j**) (CDCl<sub>3</sub>)

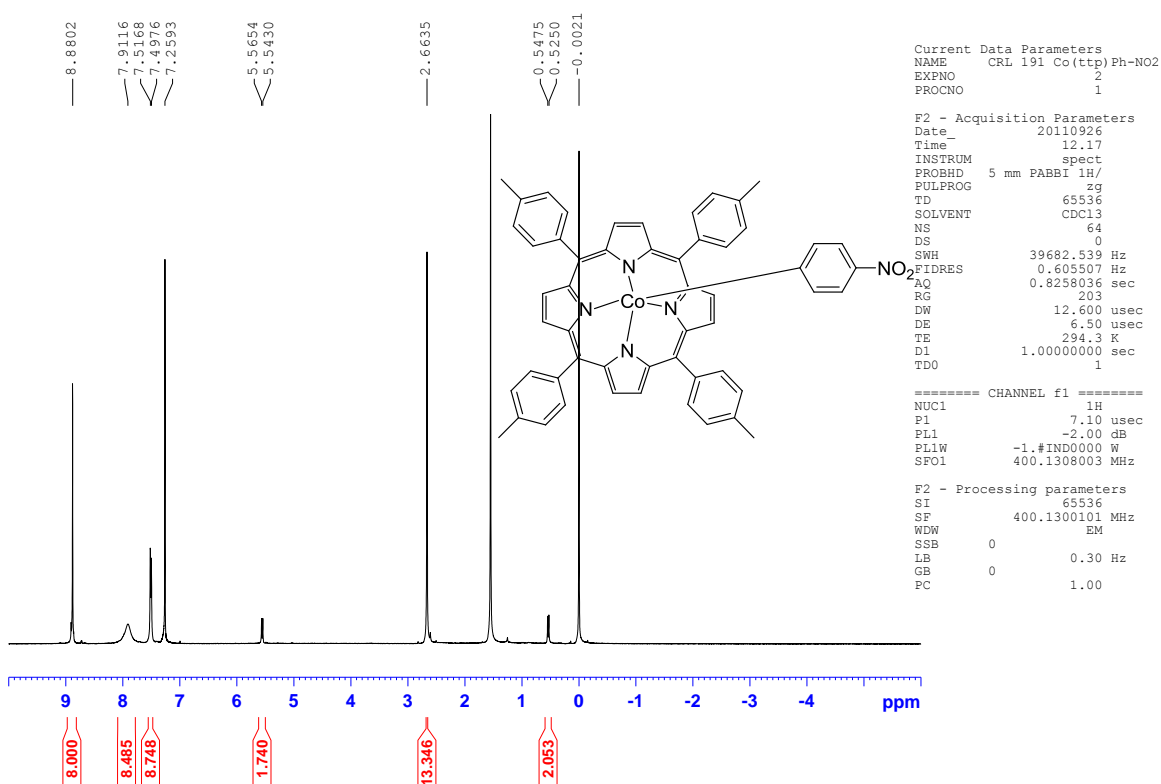

<sup>13</sup>C NMR Spectrum of Co<sup>III</sup>(ttp)C<sub>6</sub>H<sub>4</sub>(*p*-NO<sub>2</sub>) (**3j**) (CDCl<sub>3</sub>)

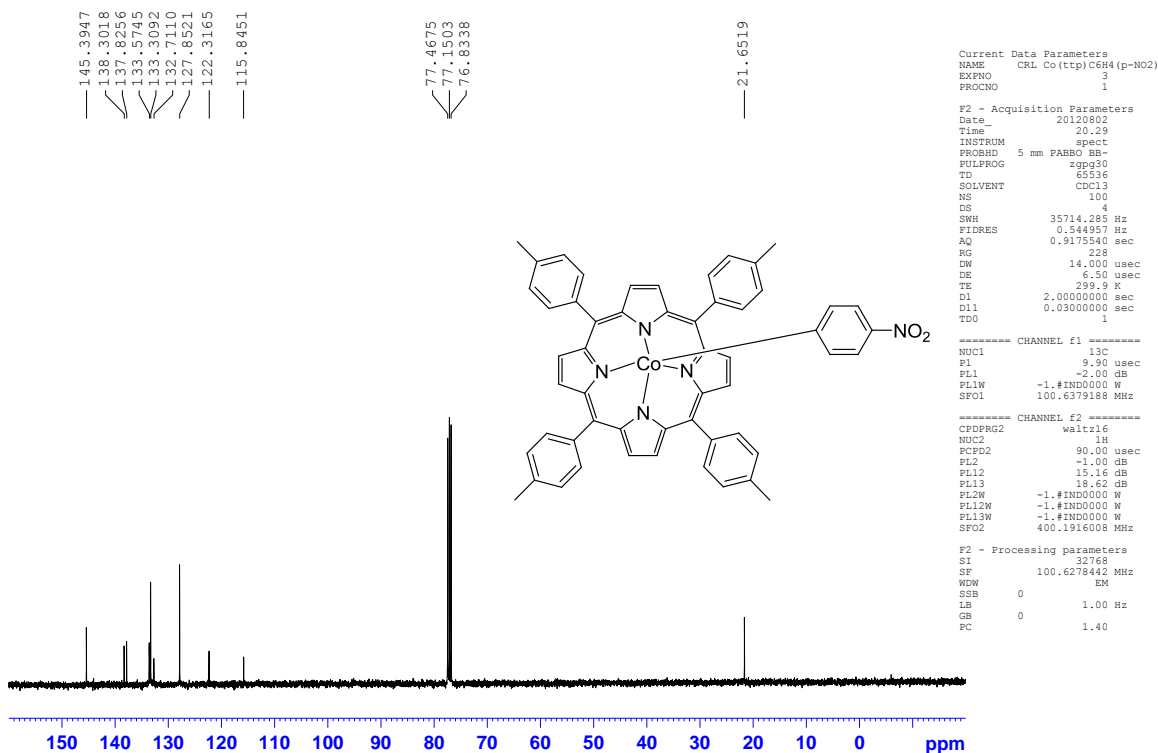

<sup>1</sup>H NMR Spectrum of Co<sup>III</sup>(ttp)C<sub>6</sub>H<sub>4</sub>(*p*-C(O)Me) (**3k**) (CDCl<sub>3</sub>)

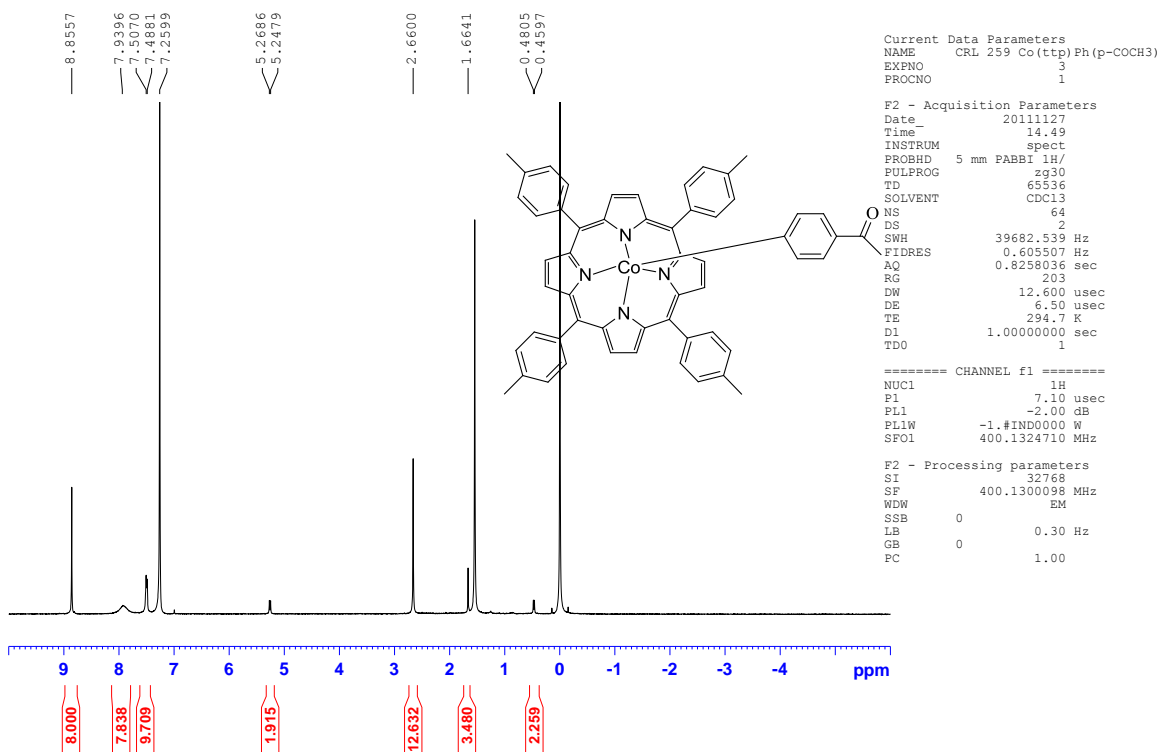

<sup>13</sup>C NMR Spectrum of Co<sup>III</sup>(ttp)C<sub>6</sub>H<sub>4</sub>(*p*-C(O)Me) (**3k**) (CDCl<sub>3</sub>)

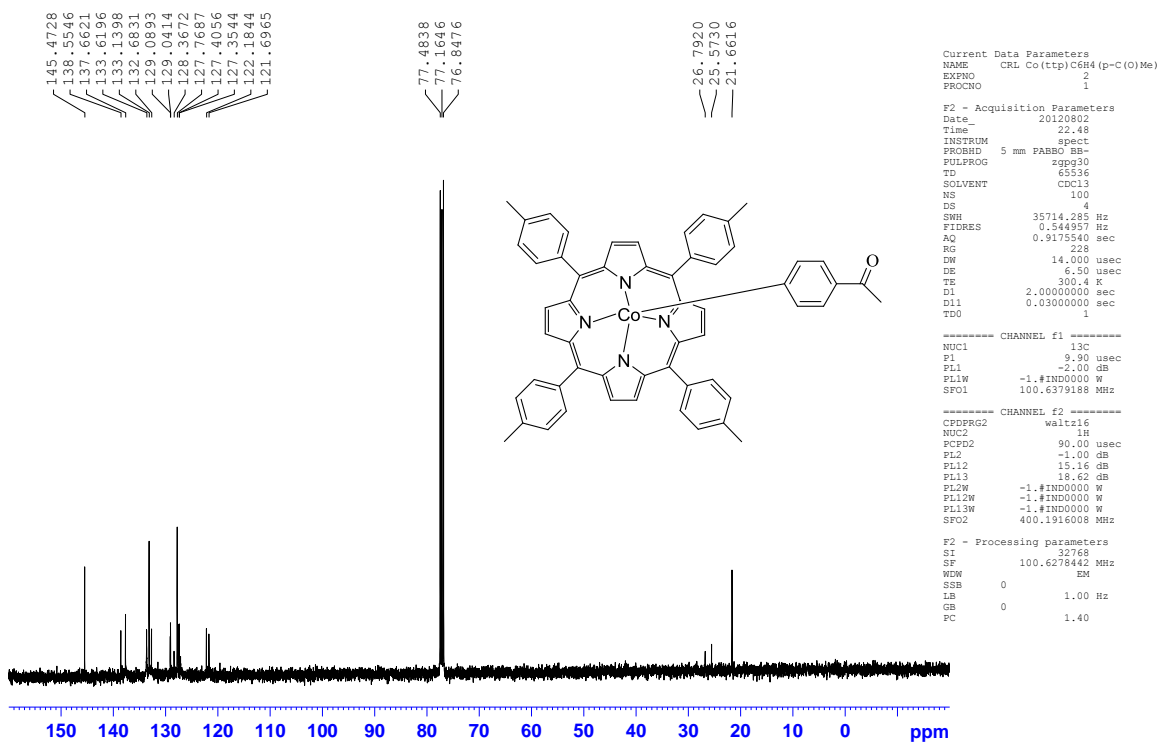

Supplement: c4dt00155a1.pdf [file c4dt00155a1.pdf]
